# Supplementary material for: Discovery of New Inhibitors of eEF2K from Traditional Chinese Medicine Based on In Silico Screening and In Vitro Experimental Validation
Source: MDPI journal article supplement (doi:10.3390/molecules27154886), 2022-07-30
Supplement: s1 [file s1]

**Table S1.** Top 10 chemicals obtained by searching 3D database

| Rank | Name                                                                                                                                  | Source plant                                               | Fit value |
|------|---------------------------------------------------------------------------------------------------------------------------------------|------------------------------------------------------------|-----------|
| 1    | Curtisian J                                                                                                                           | Paxillus curtisii                                          | 2.95072   |
| 2    | Dichotomoside B                                                                                                                       | Stellaria dichotoma                                        | 2.94267   |
| 3    | Quercetin-3-methyl-7-methyl ether-4'-sulfate                                                                                          | Ipomoea regnellii                                          | 2.93948   |
| 4    | Styraxlignolide B                                                                                                                     | Styrax japonica .                                          | 2.9365    |
| 5    | (2S,3S,1'S,2'R)-and(2S,3S,1'R,2'R)-2,3-Dihydro-5-(1',2'-di hydroxypropyl)-2-(4-hydroxy-3-methoxyphenyl)-7-met hoxy-3-methylbenzofuran | Aristolochia pubescens                                     | 2.93541   |
| 6    | Hericenone F                                                                                                                          | Heridium erinaceus                                         | 2.93007   |
| 7    | 4''',5,5'',7''-Tetrahydroxy-3''',4',7-trimethoxy-3,6''-biflavo ne                                                                     | Aristolochia ridicula                                      | 2.92876   |
| 8    | Tinosposide B                                                                                                                         | Tinospora sinensis                                         | 2.92715   |
| 9    | Triisofuhalol octaacetate                                                                                                             | Chorda filum                                               | 2.9215    |
| 10   | Manassantin A                                                                                                                         | Saururus chinensis ,<br>Houttuynia cordata,<br>Saururus sp | 2.91953   |

**Table S2.** The information of the protein templates

| Title                                       | Accession | Sequence<br>length | Bit score | Identity | E-value  | Organism                    |
|---------------------------------------------|-----------|--------------------|-----------|----------|----------|-----------------------------|
| Eukaryotic<br>elongation<br>factor 2 kinase | 6nx4_A    | 167                | 256.914   | 80       | 1.39E-81 | Homo sapiens                |
| Myosin heavy<br>chain kinase A              | 3lkm_A    | 247                | 163.696   | 36       | 1.02E-45 | Dictyostelium<br>discoideum |
| Myosin heavy<br>chain kinase A              | 3pdt_A    | 251                | 162.925   | 36       | 1.97E-45 | Dictyostelium<br>discoideum |
| Eukaryotic<br>elongation<br>factor 2 kinase | 5ks5_A    | 103                | 154.451   | 80       | 2.91E-44 | Homo sapiens                |

**Table S3.** Top 100 eEF2K inhibitor hits obtained by LibDock screening

| Rank | Name                                                                    | Source plant                                                                                                                                                                   | LibDock Score |
|------|-------------------------------------------------------------------------|--------------------------------------------------------------------------------------------------------------------------------------------------------------------------------|---------------|
| 1    | Umbilicaxanthoside B                                                    | Umbilicaria proboscidea                                                                                                                                                        | 171.438       |
| 2    | Revandchinone 1                                                         | Rheum emodi                                                                                                                                                                    | 169.069       |
| 3    | Hyacinthin                                                              | Hyacinthus orientalis, Vitis vinifera                                                                                                                                          | 169.040       |
| 4    | Bis-5, 5-nortrachelogenin                                               | Wikstroemia indica                                                                                                                                                             | 166.105       |
| 5    | Scabroside                                                              | Gentiana scabra                                                                                                                                                                | 165.151       |
| 6    | Hymenoside B                                                            | Hymenophyllum barbatum                                                                                                                                                         | 163.587       |
| 7    | Woorenoside V                                                           | Coptis japonica                                                                                                                                                                | 163.333       |
| 8    | Fortunellin                                                             | Fortunella margarita, Fortunella crassifolia                                                                                                                                   | 160.992       |
| 9    | Calyxin H                                                               | Alpinia pinnanensis                                                                                                                                                            | 160.676       |
| 10   | Alnuside C                                                              | Alnus japonica                                                                                                                                                                 | 160.113       |
| 11   | -Catechin-3-O--D-glucopyranoside                                        | Inga umbellifera                                                                                                                                                               | 159.311       |
| 12   | -3, 5-Dihydroxy-1- -7- heptane 5-O--D-glucopyranoside                   | Tacca chantrieri                                                                                                                                                               | 158.687       |
| 13   | Revandchinone 4                                                         | Rheum emodi                                                                                                                                                                    | 158.683       |
| 14   | Blepharocalyxin C                                                       | Alpinia blepharocalyx                                                                                                                                                          | 158.503       |
| 15   | -Syringoylglycerol 9-O- --D-glucopyranoside                             | Hyssopus officinalis                                                                                                                                                           | 157.202       |
| 16   | Magnolignan I                                                           | Magnolia officinalis                                                                                                                                                           | 156.208       |
| 17   | 2', 7-Dihydroxy-4'-methoxy-8-prenylflavan 2', 7-di-O--D-glucopyranoside | Morus alba , Morus alba                                                                                                                                                        | 156.054       |
| 18   | Kompasinol A                                                            | Maackia amurensis, Caragana tibetica                                                                                                                                           | 155.960       |
| 19   | Cannabisin D                                                            | Hyoscyamus niger                                                                                                                                                               | 154.383       |
| 20   | Rhoifolin                                                               | Ligustrum robustum, Lamiophlomis rotata , Poncirus trifoliata, Poncirus trifoliata, Toxicodendron succedaneum , Trachelospermum jasminoides, Rhus sylvestris, Citrus aurantium | 153.939       |
| 21   | Odontoside                                                              | Odontites serotina                                                                                                                                                             | 153.803       |
| 22   | 7-O- secologanolic acid                                                 | Lonicera japonica                                                                                                                                                              | 153.227       |
| 23   | Vitamin K2                                                              | Hippophae rhamnoides                                                                                                                                                           | 152.964       |
| 24   | Murramarin A                                                            | Murraya exotica                                                                                                                                                                | 152.936       |
| 25   | Oleoyl neocryptotanshinone                                              | Salvia miltiorrhiza                                                                                                                                                            | 152.634       |
| 26   | Oleuropein                                                              | Fraxinus chinensis, Ligustrum lucidum, Fraxinus japonica,                                                                                                                      | 152.589       |

|    |                                                                             |                                                                                                                                                                                                                                            |         |
|----|-----------------------------------------------------------------------------|--------------------------------------------------------------------------------------------------------------------------------------------------------------------------------------------------------------------------------------------|---------|
|    |                                                                             | <i>Ligustrum japonicum,</i><br><i>Olea europaea</i>                                                                                                                                                                                        |         |
| 27 | Chrysophanol-8-O--D- -glucopyranoside                                       | <i>Rheum hotaoense</i>                                                                                                                                                                                                                     | 152.437 |
| 28 | GarcinianoneB                                                               | <i>Garcinia multiflora</i>                                                                                                                                                                                                                 | 151.613 |
| 29 | Kuwanon P                                                                   | <i>Morus macroura</i>                                                                                                                                                                                                                      | 151.383 |
| 30 | -3, 5, 4'-Trihydroxystilbene 3-O--D-<br>glucopyranoside                     | <i>Eskemukerjea<br/>megacarpum</i>                                                                                                                                                                                                         | 151.353 |
| 31 | 3, 7-Dihydroxy-2, 5-diundecylnaphthoquinone                                 | <i>Aegiceras<br/>corniculatum</i>                                                                                                                                                                                                          | 150.935 |
| 32 | Muscanone                                                                   | <i>Commiphora wightii</i>                                                                                                                                                                                                                  | 150.518 |
| 33 | Sanggenon G                                                                 | <i>Morus mongolica ,<br/>Morus alba</i>                                                                                                                                                                                                    | 149.677 |
| 34 | -3, 5-Dihydroxy-1, 7-bis heptane<br>3-O--D-glucopyranoside                  | <i>Tacca chantrieri</i>                                                                                                                                                                                                                    | 149.583 |
| 35 | 1, 2-Di-O-E-sinapoyl--glucopyranose                                         | <i>Brassica napus</i>                                                                                                                                                                                                                      | 149.544 |
| 36 | 6'-O--D-Galactopyranosylsyringopicroside                                    | <i>Syringa amurensis</i>                                                                                                                                                                                                                   | 148.996 |
| 37 | Licuroside                                                                  | <i>Glycyrrhiza sp</i>                                                                                                                                                                                                                      | 148.674 |
| 38 | Hordatine B                                                                 | <i>Hordeum vulgare</i>                                                                                                                                                                                                                     | 148.105 |
| 39 | Seguinose F                                                                 | <i>Glycosmis<br/>pentaphylla</i>                                                                                                                                                                                                           | 148.033 |
| 40 | 3, 5-Dihydroxy-stilbene-3-O-neohesperidoside                                | <i>Dryopteris sublaeta<br/>Poncirus trifoliata,</i>                                                                                                                                                                                        | 147.885 |
| 41 | Neohesperidin                                                               | <i>Citrus limon, Citrus<br/>unshiu, Citrus<br/>aurantium</i>                                                                                                                                                                               | 147.873 |
| 42 | Quercetin-7-O- --glucopyranosyl-<br>--rhamnopyranoside-3-O--glucopyranoside | <i>Aconitum napellus<br/>ssp neomontanum<br/>Poncirus trifoliata,<br/>Poncirus trifoliata,<br/>Poncirus trifoliata,<br/>Drynaria fortunei,<br/>Dryopteris<br/>crassirhizoma, Citrus<br/>limon, Citrus limon,<br/>Citrus par<br/>adisi,</i> | 147.664 |
| 43 | Naringin                                                                    | <i>Flemingia strobilifera,<br/>Origanum vulgare,<br/>Citrus grandis,<br/>Citrus aurantium,<br/>Citrus aurantium,<br/>Citrus decumana,<br/>Citrus unshiu , Adiant<br/>um sp</i>                                                             | 147.539 |
| 44 | -2- -6, 7, 8-trihydroxy-5, 6, 7, 8-tetrahydro-5-<br>chromone                | <i>Aquilaria agallocha</i>                                                                                                                                                                                                                 | 147.427 |
| 45 | Mulberrofurane W                                                            | <i>Morus mongolica</i>                                                                                                                                                                                                                     | 147.418 |
| 46 | Lappal B                                                                    | <i>Arctium lappa</i>                                                                                                                                                                                                                       | 147.252 |
| 47 | Cochinchinone A                                                             | <i>Cratoxylum<br/>cochinchinense</i>                                                                                                                                                                                                       | 146.839 |
| 48 | Alnuside B                                                                  | <i>Alnus japonica</i>                                                                                                                                                                                                                      | 146.741 |

|    |                                                           |                                                                                                                                                            |         |
|----|-----------------------------------------------------------|------------------------------------------------------------------------------------------------------------------------------------------------------------|---------|
| 49 | 6", 7"-Dihydro-5', 5'''-dicapsaicin                       | Capsicum annuum                                                                                                                                            | 146.721 |
| 50 | Ixerochinoside                                            | Ixeris chinensis                                                                                                                                           | 146.680 |
| 51 | Kukoamine A                                               | Lycium chinense                                                                                                                                            | 146.606 |
| 52 | 3'-O-trans-Cinnamoyl-astilbin                             | Andira inermis                                                                                                                                             | 146.567 |
| 53 | 7-O-Methylaloeresin A                                     | Aloe marlothii                                                                                                                                             | 146.472 |
| 54 | 3'-Prenyl-4'-methoxy-isoflavone-7-O'-D-glycopyranoside    | Sopubia delphinifolia                                                                                                                                      | 146.377 |
| 55 | 10-Hydroxy-4-O-methyl-2, 11-diundecylgomphilactone        | Aegiceras corniculatum                                                                                                                                     | 146.273 |
| 56 | Hymenoside I                                              | Hymenophyllum barbatum                                                                                                                                     | 146.213 |
| 57 | Yemuoside YM1                                             | Stauntonia chinensis                                                                                                                                       | 146.021 |
| 58 | Hexaspermone C                                            | Ochna macrocalyx, Ouratea hexasperma                                                                                                                       | 146.006 |
| 59 | Artocommunol CB                                           | Artocarpus incisa                                                                                                                                          | 145.809 |
| 60 | Salvianolic Acid B                                        | Salvia miltiorrhiza                                                                                                                                        | 145.726 |
| 61 | Urobilin                                                  | Homo sapiens                                                                                                                                               | 145.462 |
| 62 | -3, 5, 3', 4'-Tetrahydroxystilbene 3-O--D-glucopyranoside | Eskemukerjea megacarpum                                                                                                                                    | 145.247 |
| 63 | 6"--D-Xylose-genistin                                     | Glycine max                                                                                                                                                | 144.838 |
|    |                                                           | Garcinia mangostana, Cinnamomum bejolghota, Pinus radiata, Davallia mariesii, Theobroma cacao,                                                             |         |
| 64 | Procyanidin B5                                            | Campylotropis hirtella, Aesculus hippocastanum, Cinnamomum cassia, Dioscorea cirrhosa, Pinus taeda Rheum sp, Salix caprea, Cinnamomum cassia, Pinus taeda, | 144.626 |
| 65 | Procyanidin B7                                            | Vaccinium vitis-idaea, Cinnamomum camphora                                                                                                                 |         |
| 66 | Diospyrosonaphthoside                                     | Diospyros angustifolia                                                                                                                                     | 144.487 |
| 67 | Ruixianglangdusu B                                        | Stellera chamaejasme                                                                                                                                       | 144.466 |
| 68 | Ruixianglangdusu A                                        | Stellera chamaejasme                                                                                                                                       | 144.466 |
| 69 | Silybin                                                   | Silybum marianum                                                                                                                                           | 144.431 |
| 70 | Silybin B                                                 | Silybum marianum                                                                                                                                           | 144.431 |
| 71 | AH21                                                      | Aquilaria agallocha                                                                                                                                        | 144.388 |
| 72 | Procyanidin B5 3'-O-gallate                               | Vitis amurensis                                                                                                                                            | 144.233 |
| 73 | Procyanidin B2-3"-O--D-allopyranoside                     | Pronephrium simplex                                                                                                                                        | 144.232 |
| 74 | Saccatoside                                               | Gmelina philippensis, Verbascum saccatum                                                                                                                   | 144.225 |

|     |                                                                |                                               |         |
|-----|----------------------------------------------------------------|-----------------------------------------------|---------|
| 75  | Kushenol B                                                     | Sophora flavescens                            | 144.147 |
| 76  | Tenuiphenone C                                                 | Polygala tenuifolia                           | 143.991 |
| 77  | Ligustrosidic acid                                             | Ligustrum lucidum                             | 143.897 |
| 78  | Protosappanin E1                                               | Caesalpinia sappan                            | 143.892 |
| 79  | Protosappanin E2                                               | Caesalpinia sappan                            | 143.892 |
| 80  | 2-n-Pentacosyl-5, 7-dihydroxy-6, 8-dimethyl chromone           | Sophora flavescens                            | 143.735 |
| 81  | Magnesium lithospermate                                        | Cordia spinescens                             | 143.675 |
| 82  | -2- -6, 7, 8-trihydroxy-5, 6, 7, 8-tetrahydro-5-<br>-chromone  | Aquilaria agallocha                           | 143.569 |
| 83  | 4-Methoxyphenyl 1-O--D- -apiofuranosyl-<br>--D-glucopyranoside | Tabebuia<br>impetiginosa                      | 143.247 |
| 84  | Odoratin                                                       | Gnidia lamprantha,<br>Daphne odora            | 143.239 |
| 85  | Alpinnanin A                                                   | Alpinia pinnanensis                           | 143.052 |
| 86  | Alpinnanin B                                                   | Alpinia pinnanensis                           | 143.052 |
| 87  | 2-Methoxy-5- -phenyl-1-O-<br>--D-glucopyranoside               | Baseonema<br>acuminatum                       | 143.022 |
| 88  | Calyxin L                                                      | Alpinia<br>blepharocalyx                      | 142.964 |
| 89  | Tribulusamide B                                                | Tribulus terrestris                           | 142.940 |
| 90  | Dimeric 4, 2', 4'-trihydroxydihydrochalcone                    | Agapanthus<br>africanus                       | 142.779 |
| 91  | -ent-18- -Coumaroyloxy-8 -labden-15-oic acid                   | Nuxia sphaerocephala                          | 142.774 |
| 92  | Brachystamide C                                                | Piper<br>brachystachyum                       | 142.771 |
| 93  | Trifochalcanolide I                                            | Trifolium<br>alexandrinum                     | 142.745 |
| 94  | Hymenoside E                                                   | Hymenophyllum<br>barbatum                     | 142.696 |
| 95  | Chrysophanol 8-O--D- glucopyranoside                           | Rheum qinlingense                             | 142.689 |
| 96  | Sigmoidin A                                                    | Erythrina abyssinica ,<br>Erythrina sigmoidea | 142.667 |
| 97  | Lappaol E                                                      | Arctium lappa                                 | 142.511 |
| 98  | Violyedoenamide                                                | Viola yedoensis                               | 142.473 |
| 99  | Epicalyxin I                                                   | Alpinia<br>blepharocalyx                      | 142.395 |
| 100 | Hydroxygerambullol                                             | Glycosmis<br>chlorosperma                     | 142.192 |

Note: The chemicals labeled in red, *i.e.*, Rhoifolin and Oleuropein, were selected for verifying the reliability of the screen.
