# Supplementary material for: Discovery of New Inhibitors of eEF2K from Traditional Chinese Medicine Based on In Silico Screening and In Vitro Experimental Validation
Source: MDPI journal article supplement (doi:10.3390/molecules27154886), 2022-07-30
Supplement: s1 [file s1]

**Figure S1**

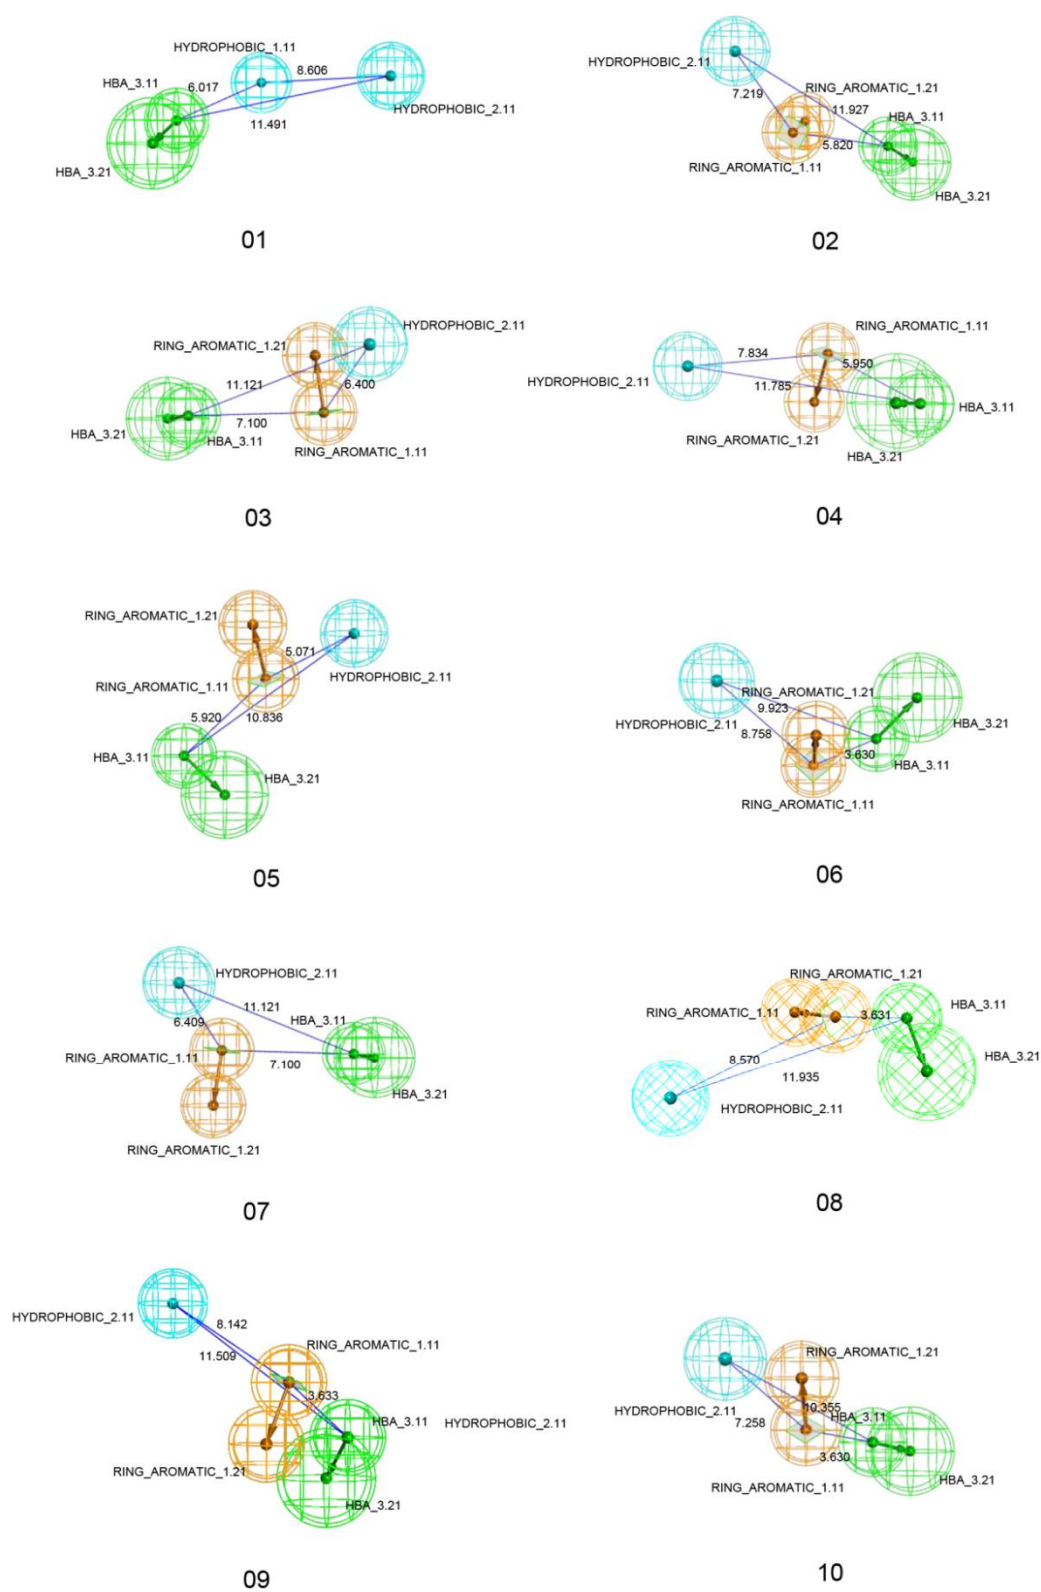

**Figure S1.** 10 pharmacophore models based on the common characteristics of molecules. Among them, green represents the hydrogen bond receptor, orange represents the aromatic ring center, and blue represents the hydrophobic center.

**Figure S2**

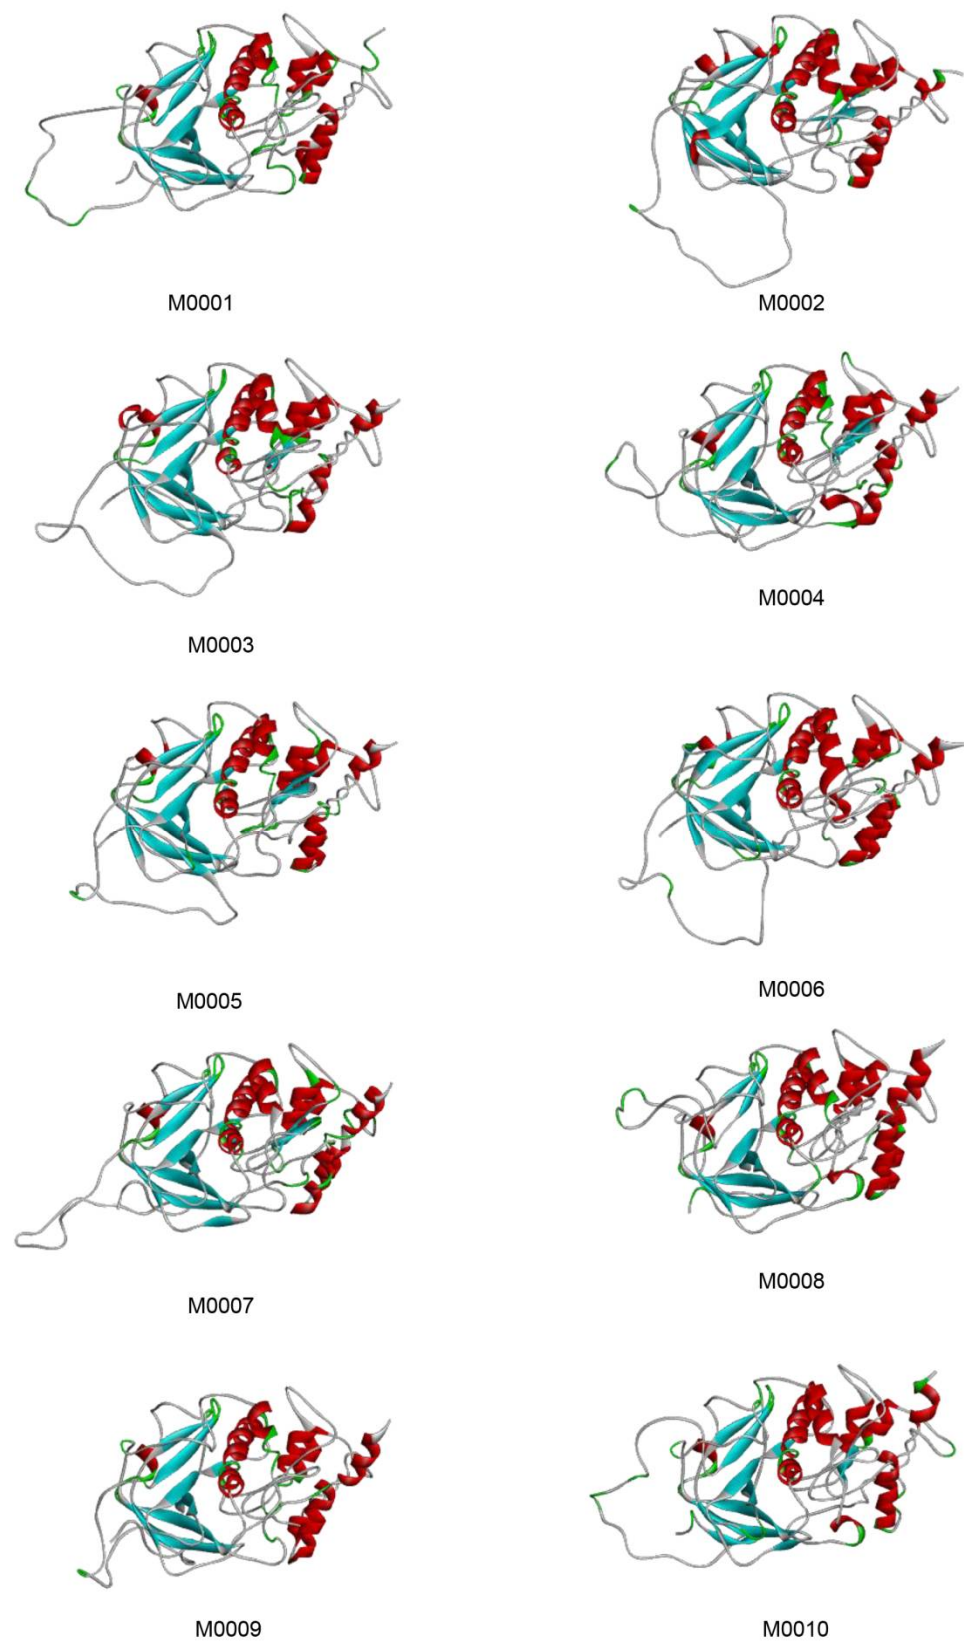

**Figure S2.** 10 predicted eEF2K crystal structures based on homology modeling.

**Figure S3**

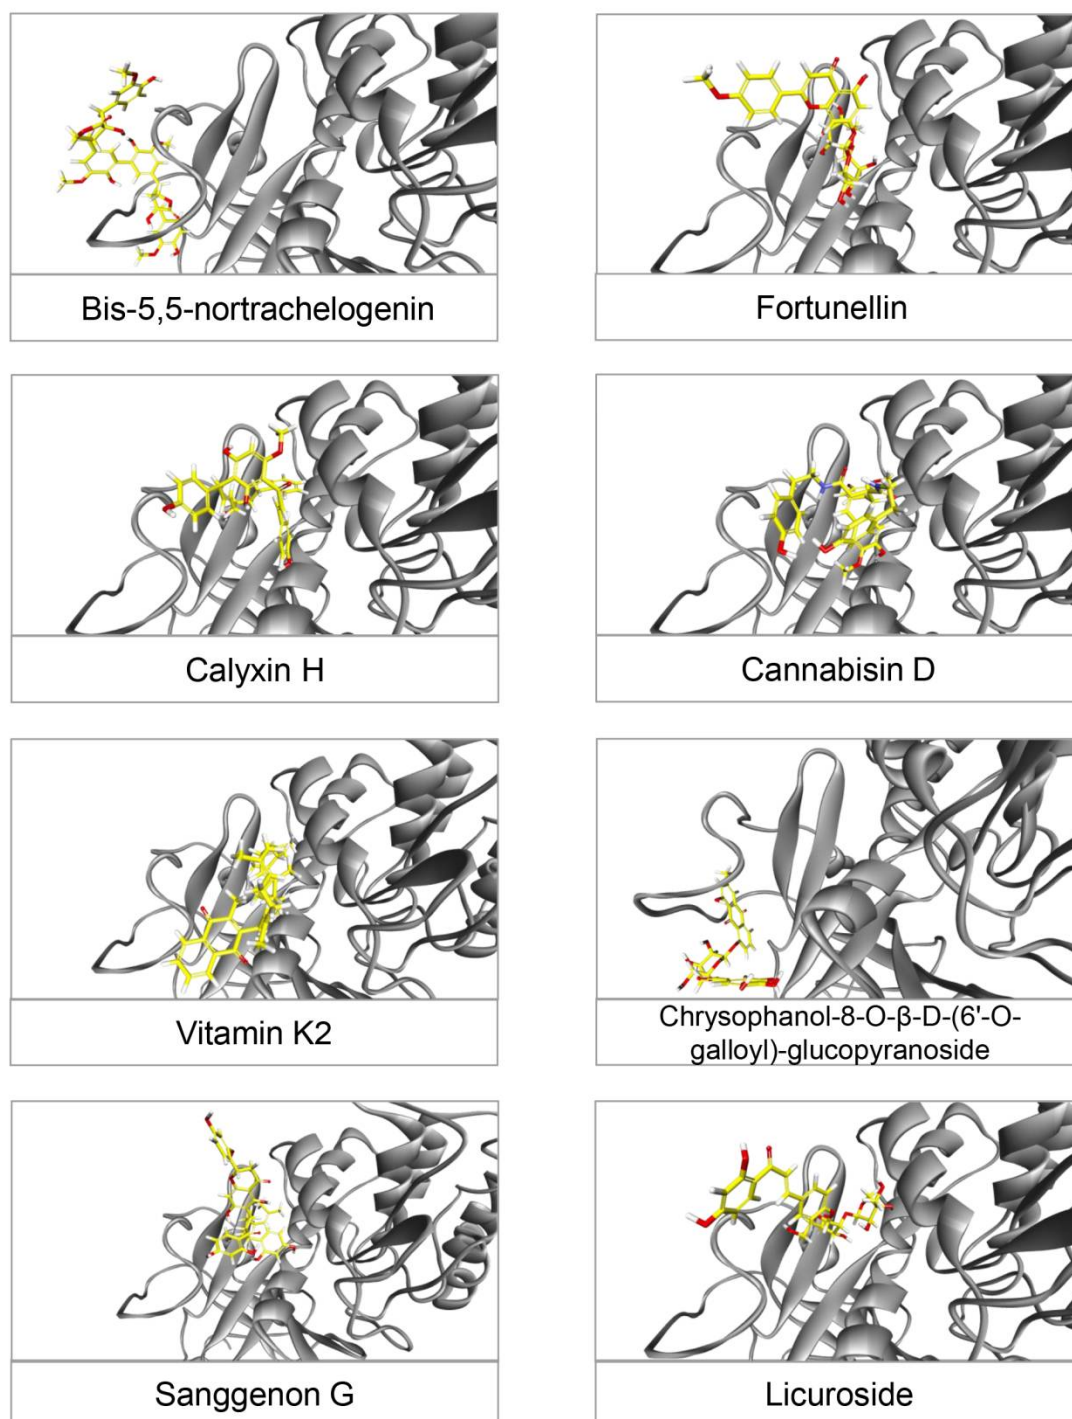

**Figure S3.** The positions of top 8 of 10 purchasable compounds in the binding pocket of eEF2K crystal structure.

**Figure S4**

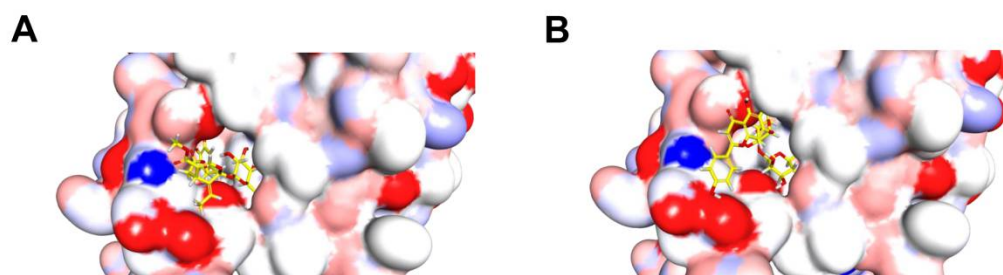

**Figure S4.** 3D images of the interaction between Oleuropein (A) and Rhoifolin (B) with eEF2K.

**Figure S5**

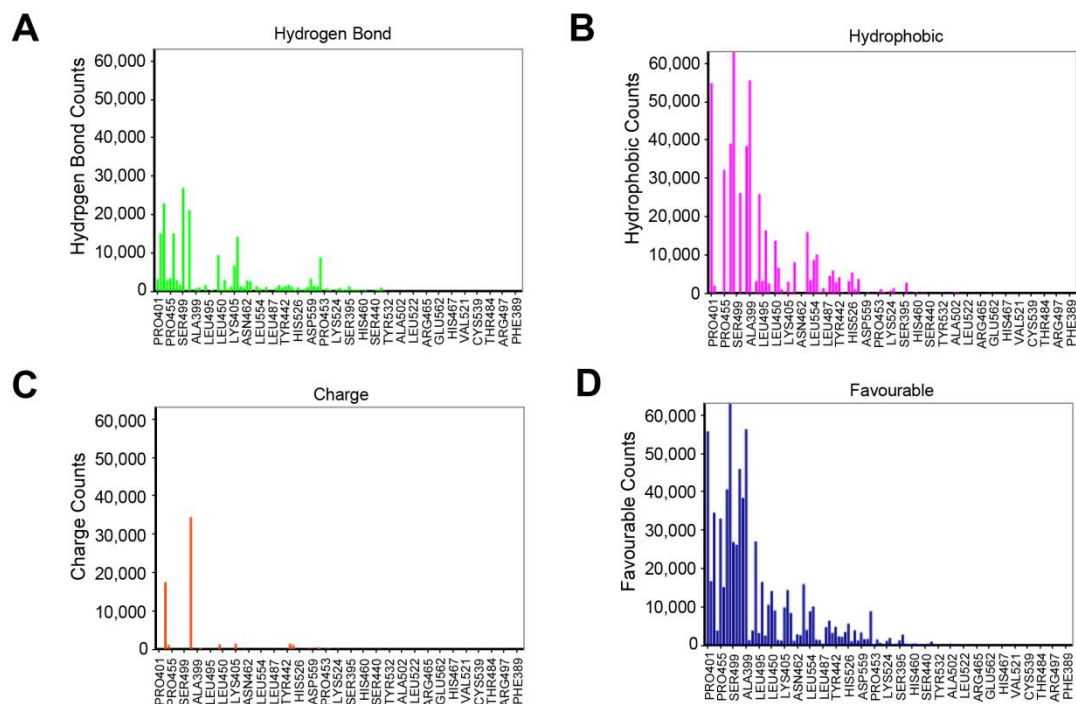

**Figure S5.** Residue Interaction Histograms. (A) Hydrogen bond interaction with residues histogram. (B) Hydrophobic interaction with residues histogram. (C) Charge interaction with residues histogram. (D) Favourable interaction with residues histogram.
